# Supplementary material for: Single-cell RNA-Seq reveals the transcriptional landscape and heterogeneity of skin macrophages in Vsir-/- murine psoriasis
Source: PubMed Central journal article supplement (PMC7482809; doi:10.7150/thno.45614), 2020-08-21
Supplement: thnov10p10483s1.pdf [file thnov10p10483s1.pdf]

## Supplemental Results

### **Transcriptional profile of neutrophil cell subsets was described in murine psoriasis.**

A total of 1,261 neutrophil cells that were clustered into 5 clusters (Figure S11A). Neutrophils constituted 5.91% of total cells in *Vsir<sup>-/-</sup>* psoriatic mice. Most interestingly, this percentage was a little lower than that in WT psoriatic mice (6.56%) (Figure S4B). We noted that, while neutrophil cluster 0 (*Ube2c<sup>+</sup> Rrm2<sup>+</sup>*) and 1 (*Apoe<sup>+</sup> C4b<sup>+</sup>*) were the main neutrophil clusters involved in both groups, cluster 3 (*Lcn2<sup>+</sup> Ngp<sup>+</sup>*) was present at high level in *Vsir<sup>-/-</sup>* psoriatic mice (Figure S11A-B). *Flt3* and *Clec9a* were marker genes of cluster 4, which also expressed *Klrd1*, *H2-Ob* and *Sept3*. Cluster 2 expressed *Chil3*, *Vcan* and *Plac8* (Figure S11C).

After defining the neutrophils in our dataset, we identified differentially expressed genes between WT and *Vsir<sup>-/-</sup>* psoriatic mice of the skin. We focused on the two-fold upregulated or two-fold downregulated genes in neutrophils of *Vsir<sup>-/-</sup>* psoriatic mice neutrophils compared to that of WT psoriatic mice. Heatmap for the expression of *Hspb1*, *Cebpb*, *Gm8797* and *Lyz1* demonstrated that these genes were upregulated, while *Stab1* was downregulated in DCs from *Vsir<sup>-/-</sup>* psoriatic mice lesions compared to WT psoriatic mice lesions (Figure S11D). Compared to those isolated from WT psoriatic mice, neutrophils isolated from psoriatic *Vsir<sup>-/-</sup>* mice may have contributed to negative regulation of apoptotic process, negative regulation of programmed cell death and positive regulation of immune system process (Figure S12).

### **T cell cluster was identified in *Vsir<sup>-/-</sup>* psoriatic mice.**

A total of 625 T cells were detected (Figure S13A). Cd3e and Cxcr6 were marker genes of T cells, which also expressed Trdv4, Cd3d and Cd3g (Figure S13B). T cells were generally present at low levels in WT psoriatic mice but proliferated in *Vsir*<sup>-/-</sup> psoriatic mice (Figure S4B). But approximately 5.82% of skin cells were T cells in *Vsir*<sup>-/-</sup> psoriatic mice, only 1.27% skin cells were T cells in WT psoriatic mice (Figure S4B). Based on these results, We suspected that T cells may not play major role such as macrophages in psoriatic mice.

After defining the T cells, we identified differentially expressed genes between the skin lesions of WT and *Vsir*<sup>-/-</sup> psoriatic mice. We focused on the two-fold upregulated or two-fold downregulated genes in T cells of *Vsir*<sup>-/-</sup> psoriatic mice T cells compared to that of WT psoriatic mice. Heatmap for the expression of *Crem*, *Cebpb*, *Gzma* and *Tnfrsf9* demonstrated that these genes were upregulated, while *Plaur* was downregulated in T cells from *Vsir*<sup>-/-</sup> psoriatic mouse skin compared to WT psoriatic mouse skin lesions (Figure S14A). Furthermore, T cells isolated on *Vsir*<sup>-/-</sup> psoriatic mice were shown to be involved in regulation of leukocyte differentiation, regulation of hemopoiesis and leukocyte cell-cell adhesion (Figure S15).

We defined clonotypes based on CDR3 sequences of both TCR  $\alpha$  and  $\beta$  chains using the Cell Ranger analysis pipeline. To adequately define T cell clonality, we strictly defined T cells with at least one pair of identical paired  $\alpha$ - $\beta$  chains to be one clone from the same ancestry, and the expanded clones were defined as those whose  $\alpha$  and  $\beta$  TCR pairs were shared by at least three cells in a given cell population. We noted that, most cells contained unique TCRs in both two groups of mice. While only~10% T

cells harbored clonal TCRs in WT psoriatic mice, *Vsir*<sup>-/-</sup> psoriatic mice showed a much higher percentage at ~20% (Figure S14B).

**Other small cell clusters were detected in murine psoriasis.**

In addition to the large populations of immune cells detected during murine psoriasis described above, other cell types were separated into 7 clusters, including natural killer (NK) cells, epithelial cells, endothelial cells, mast cells, B cells, myocytes and adipocytes (Figure S16). In addition, the different clusters were characterized by the expression of other relevant markers (Figure S17). We identified the NK cells characterized by *Ncr1*, *Klra4*, *Klra8* and *Gzma* expression. *Ifng* also highly expressed in NK cells (Figure S17A). The proportion of NK cells increased in psoriatic *Vsir*<sup>-/-</sup> mice (Figure S4B). And NK cells played roles in the protein refolding in psoriatic *Vsir*<sup>-/-</sup> mice (Figure S19). Epithelial cells were identified by expression of *Defb6*, *Krt15*, *Cst6* and *Pla2g2f* (Figure S17B). Gene expression patterns of established canonical markers of endothelial cells (*Emcn*, *Sox17*, *Cldn5*, *Esam*), mast cells (*Fcer1a*, *Tpsg1*, *Slc6a4*, *Cyp11a1*) and B cells (*Iglv1*, *Jchain*, *Cd79a*, *Igk2*) allowed us to assign putative biological identities to these clusters (Figure S17). Furthermore, these three clusters increased in psoriatic *Vsir*<sup>-/-</sup> mice (Figure S4B). The increase of endothelial cells in *Vsir*<sup>-/-</sup> psoriatic mice may be relative to angiogenesis. B cells, epithelial cells and adipocytes contained the large numbers of UMIs. This finding might suggest that these clusters were more “active” (Figure 1C).

## Supplementary Figures

Figure S1.

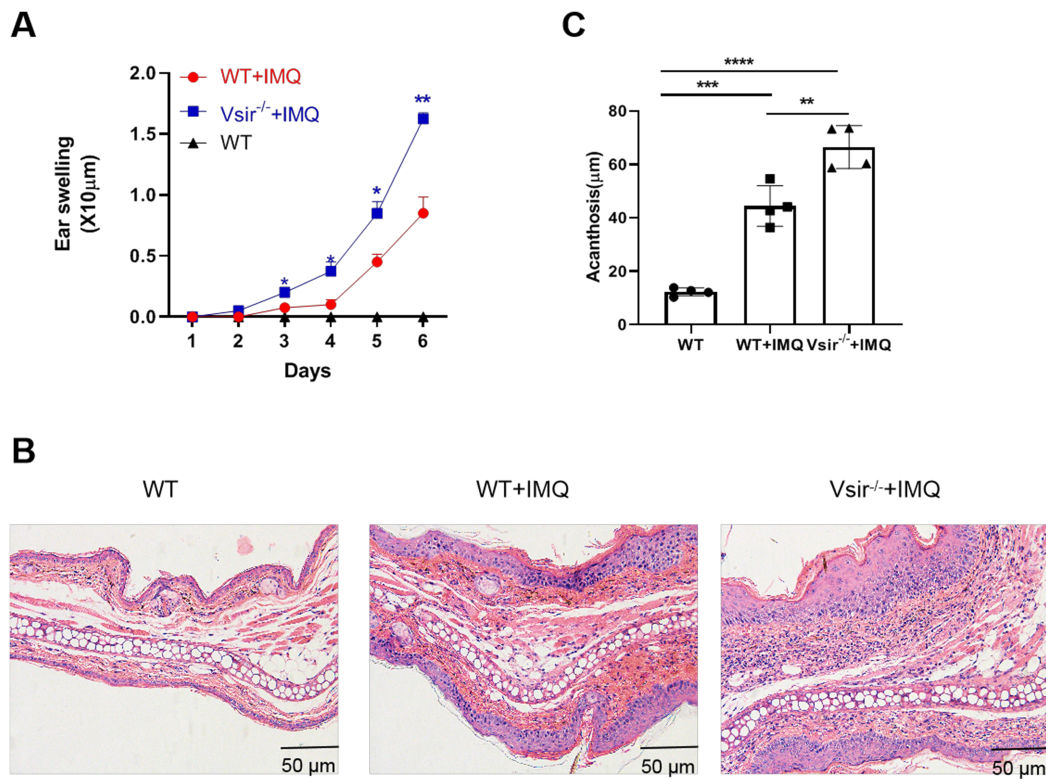

**Figure S1. VISTA deficiency exacerbated the IMQ-induced psoriasiform inflammation.**

(A) WT and Vsir<sup>-/-</sup> mice were topically treated daily on right ear and back skin with 5% IMQ cream for 5 days. Ear thickness was measured daily. Ear swelling is shown as the increase of ear thickness when compared to day 0, and expressed as mean  $\pm$  SEM (n = 4). (B) H&E staining of the right ear skin of WT+IMQ and Vsir<sup>-/-</sup>+IMQ mice; Scale bar 50  $\mu$ m. ( $\times 200$ ). (C) Ear skins were collected for H&E staining and analyzed for average acanthosis of ear. n=4. H&E, hematoxylin-eosin. IMQ, imiquimod. Vsir<sup>-/-</sup>, Vsir knockout mice. WT, wild type.



Figure S2.

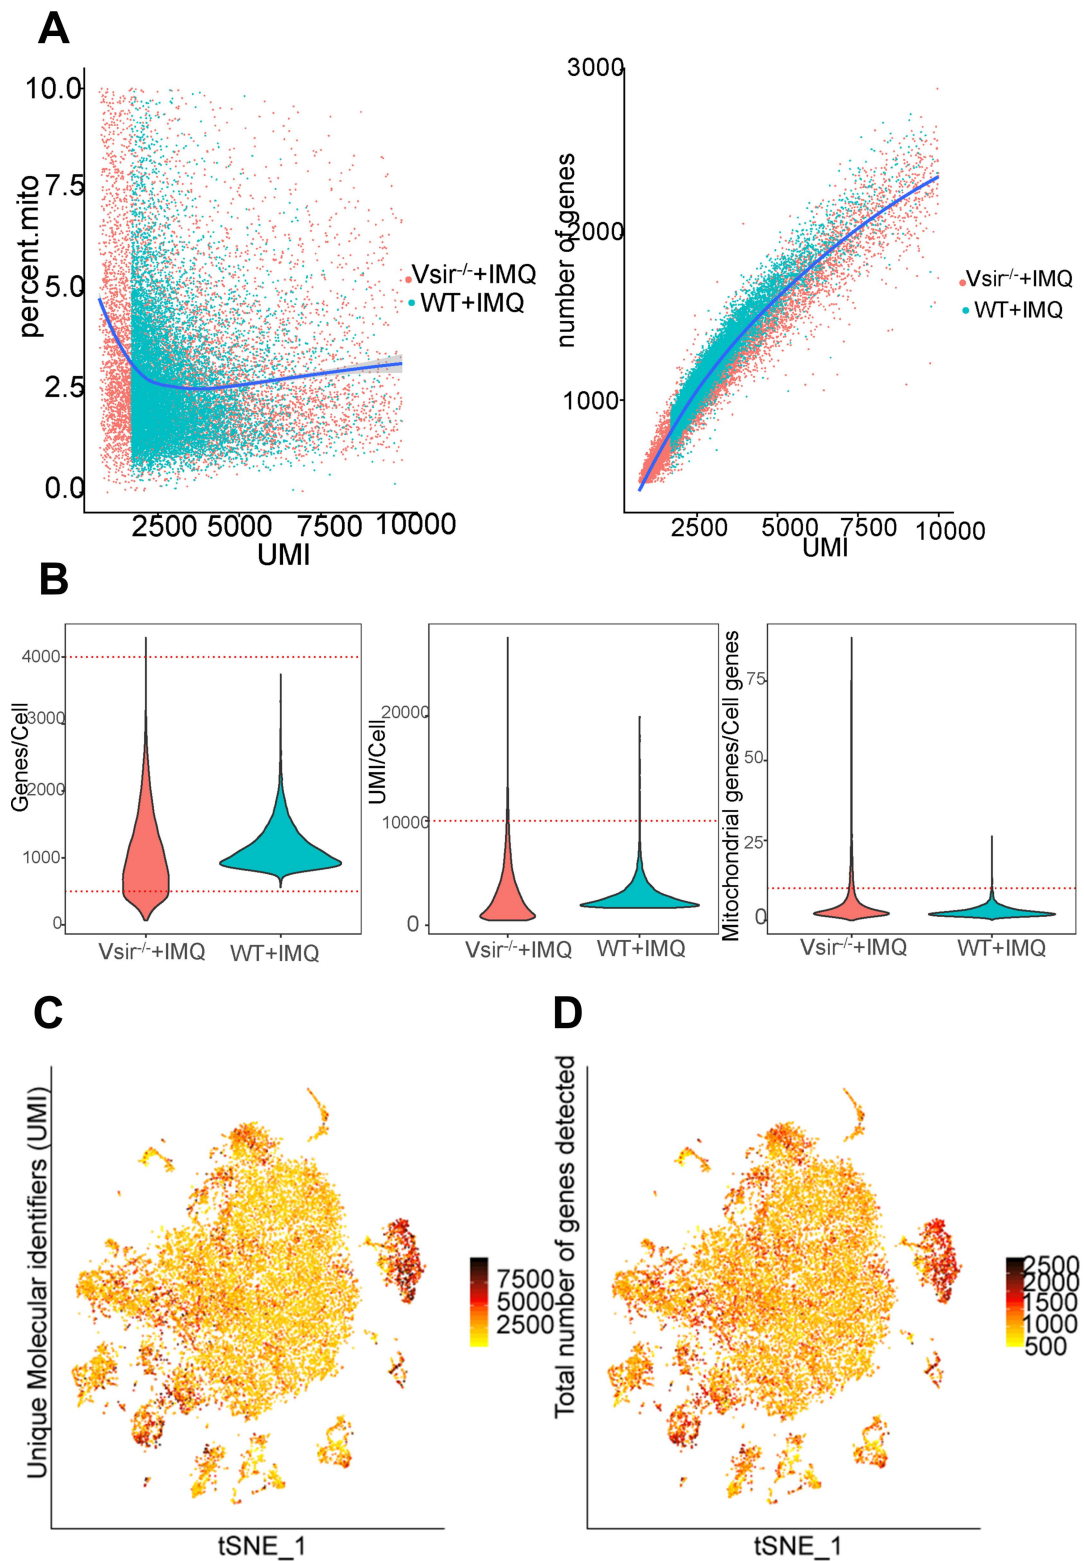

Figure S2. Quality control metrics of scRNA-seq data from *Vsir*<sup>-/-</sup> psoriatic mice

**were analyzed.**

**(A)** The percent of mitochondrial genes were shown. **(B)** Genes/Cell, Unique Molecular Identifiers (UMI)/Cell, and percent of mitochondrial genes/cell genes were shown. **(C)** tSNE plot with color-coded UMIs per cell is shown. Cells with the highest UMI are colored black. **(D)** tSNE plot with color-coded number of expressed genes per cell was shown. Cells with the highest number of expressed genes are colored black. tSNE, t-distributed stochastic neighbour embedding. UMIs, unique molecular identifiers.

**Figure S3.**

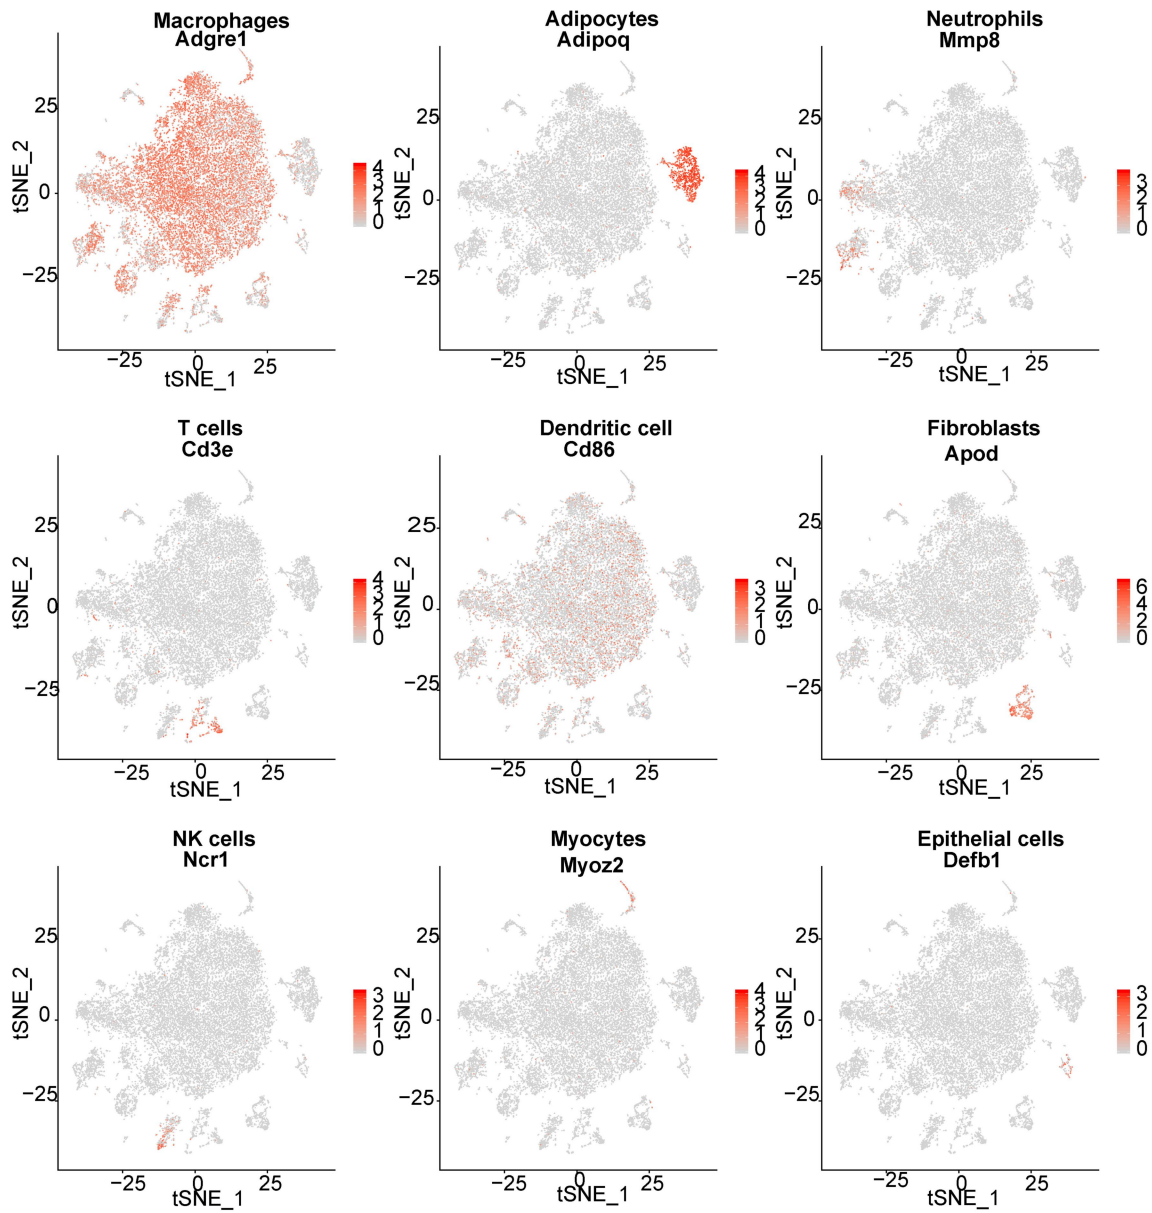

**Figure S3. Cell types were identified.**

Expression of the classical marker genes used to define different cell types. NK cells, natural killer cells.

**Figure S4.**

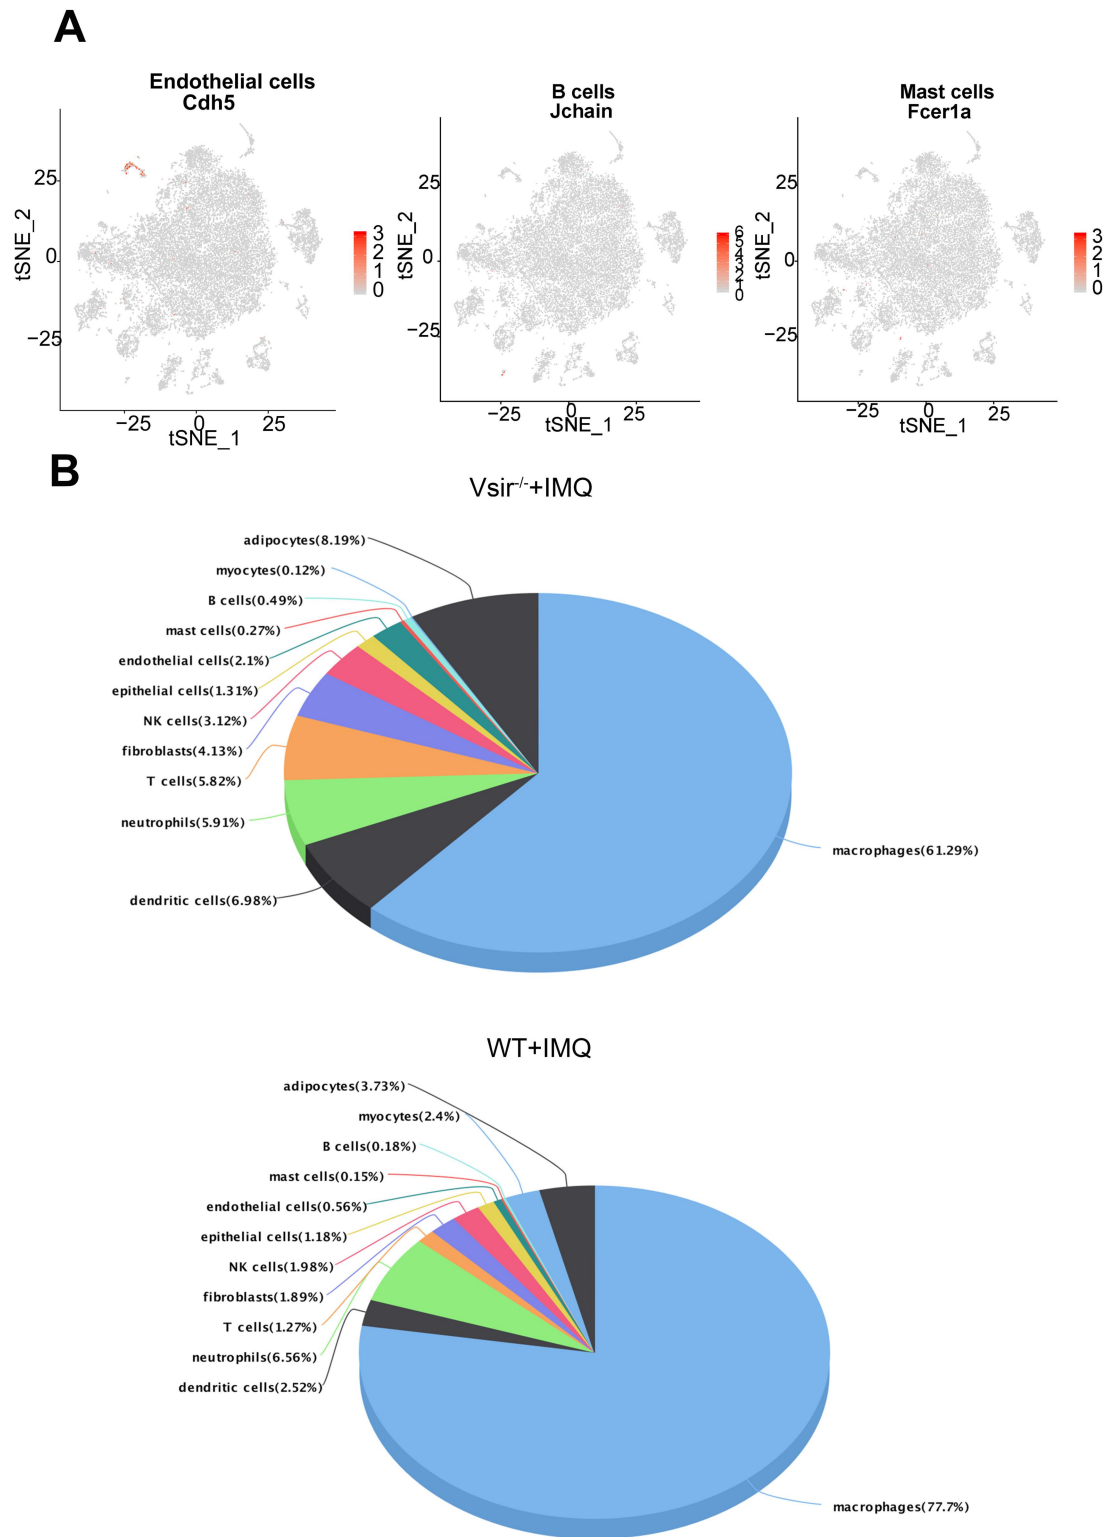

**Figure S4. Proportions of all cell populations in WT and *Vsir<sup>-/-</sup>* psoriatic mice**

**were shown.**

**(A)** Expression of the classical marker genes used to define different cell types. **(B)**

Proportions of all cell populations within total skin cells in WT and *Vsir*<sup>-/-</sup> psoriatic mice.

**Figure S5.**

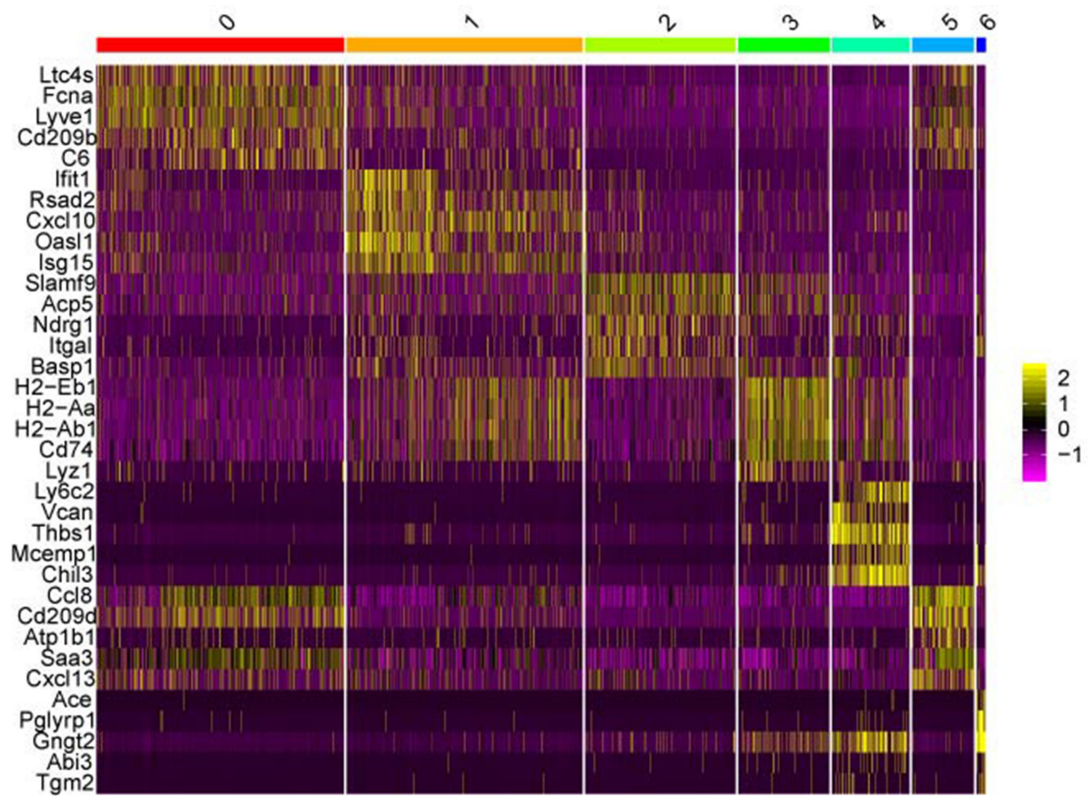

**Figure S5. Specific marker genes in each macrophage cluster were show in heatmap.**

Figure S6.

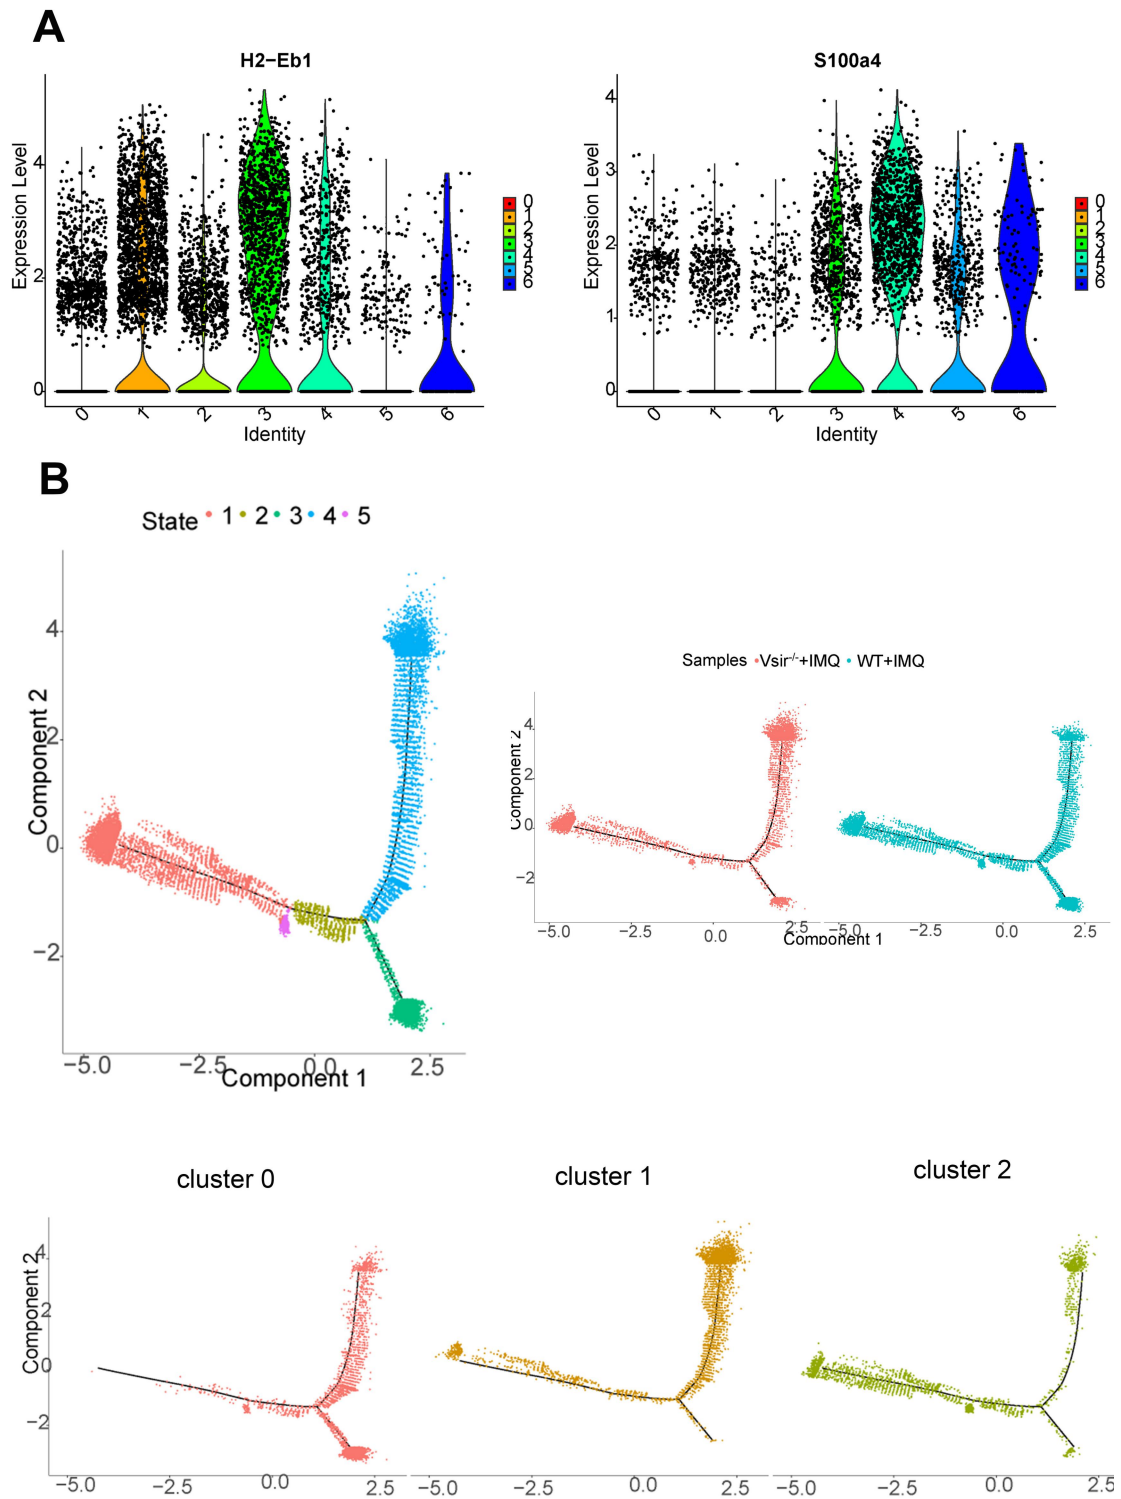

Figure S6. Signature genes and distinct cell trajectory states for macrophage cell clusters were described.

**(A)** Violin plots of specific marker genes in each macrophage cluster. **(B)** Distinct cell trajectory states defined by single cell transcriptomes and pseudotime trajectory of macrophages shown separately for WT and *Vsir<sup>-/-</sup>* psoriatic mice (top panel). Trajectory of macrophages from clusters 0, 1 and 2 using the Monocle 2 algorithm (bottom panel).



Figure S7.

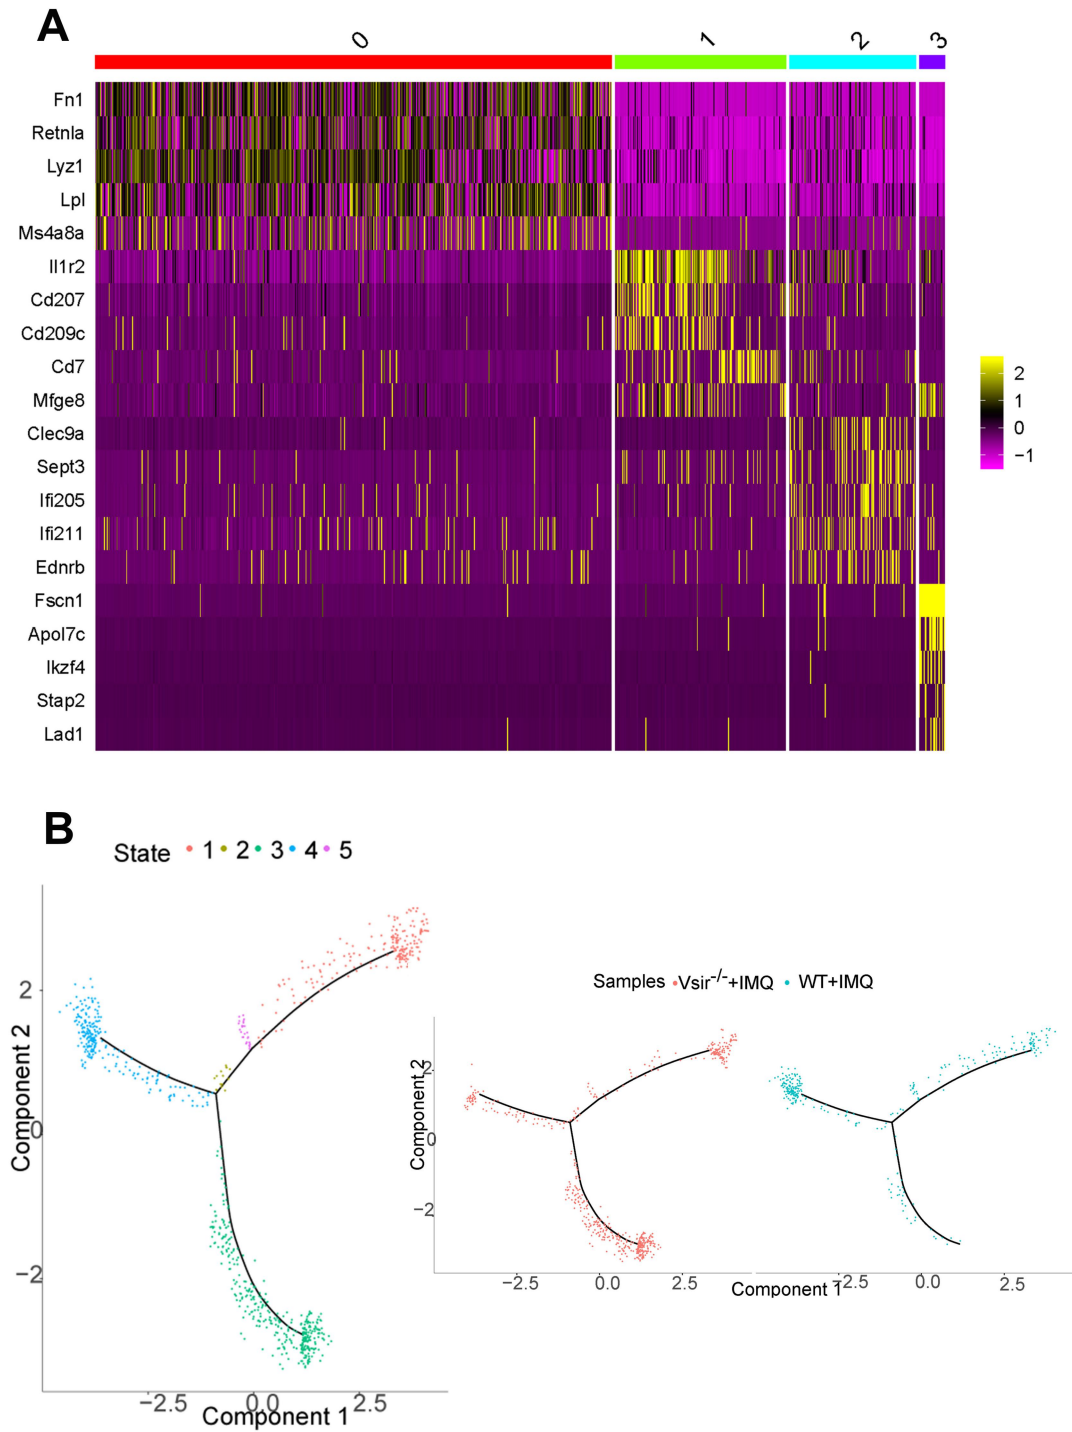

Figure S7. Signature genes and distinct cell trajectory states for DC clusters were described.

**(A)** Heatmap showing specific marker genes in each DC cluster. **(B)** Trajectory of DCs from clusters 0, 1, 2 and 3 using the Monocle 2 algorithm. DCs: dendritic cells.

Figure S8.

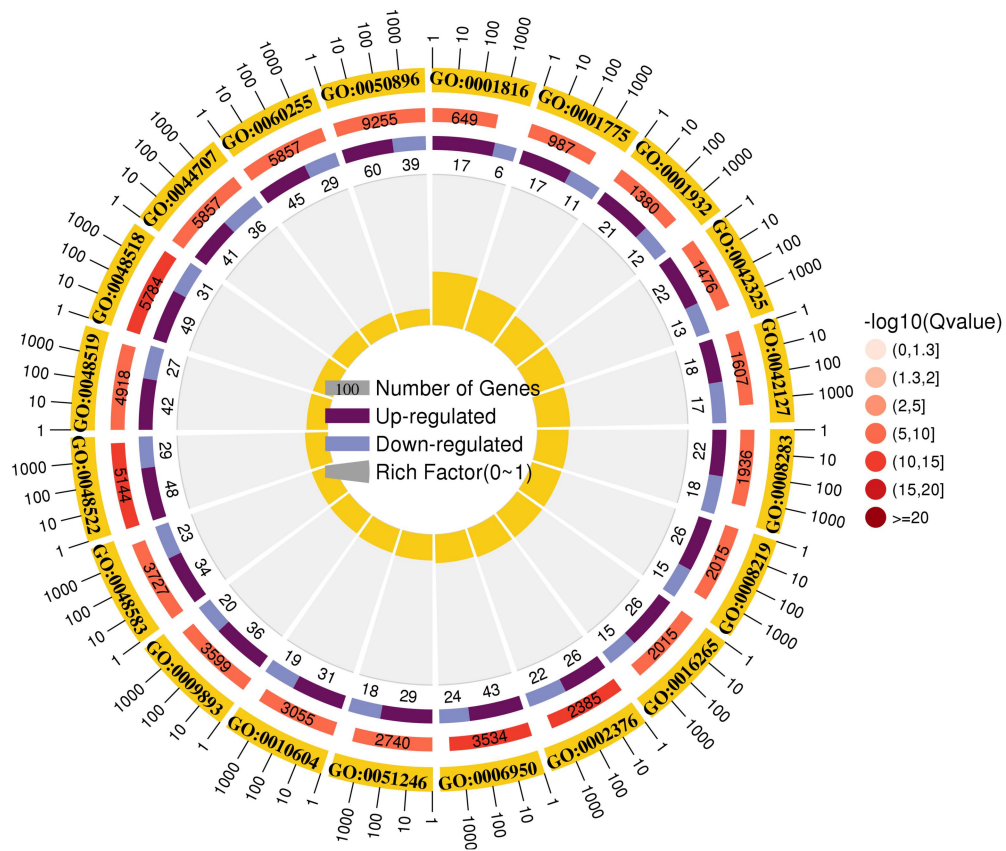

| GO ID      | Description                                            |
|------------|--------------------------------------------------------|
| GO:0006950 | response to stress                                     |
| GO:0048522 | positive regulation of cellular process                |
| GO:0048518 | positive regulation of biological process              |
| GO:0002376 | immune system process                                  |
| GO:0044707 | single-multicellular organism process                  |
| GO:0048519 | negative regulation of biological process              |
| GO:0050896 | response to stimulus                                   |
| GO:0042325 | regulation of phosphorylation                          |
| GO:0008219 | cell death                                             |
| GO:0016265 | death                                                  |
| GO:0008283 | cell proliferation                                     |
| GO:0009893 | positive regulation of metabolic process               |
| GO:0048583 | regulation of response to stimulus                     |
| GO:0001775 | cell activation                                        |
| GO:0001816 | cytokine production                                    |
| GO:0001932 | regulation of protein phosphorylation                  |
| GO:0060255 | regulation of macromolecule metabolic process          |
| GO:0051246 | regulation of protein metabolic process                |
| GO:0010604 | positive regulation of macromolecule metabolic process |
| GO:0042127 | regulation of cell proliferation                       |

Figure S8. GO term analysis of upregulated pathways in *Vsir<sup>-/-</sup>* versus WT DCs was performed.

**Figure S9.**

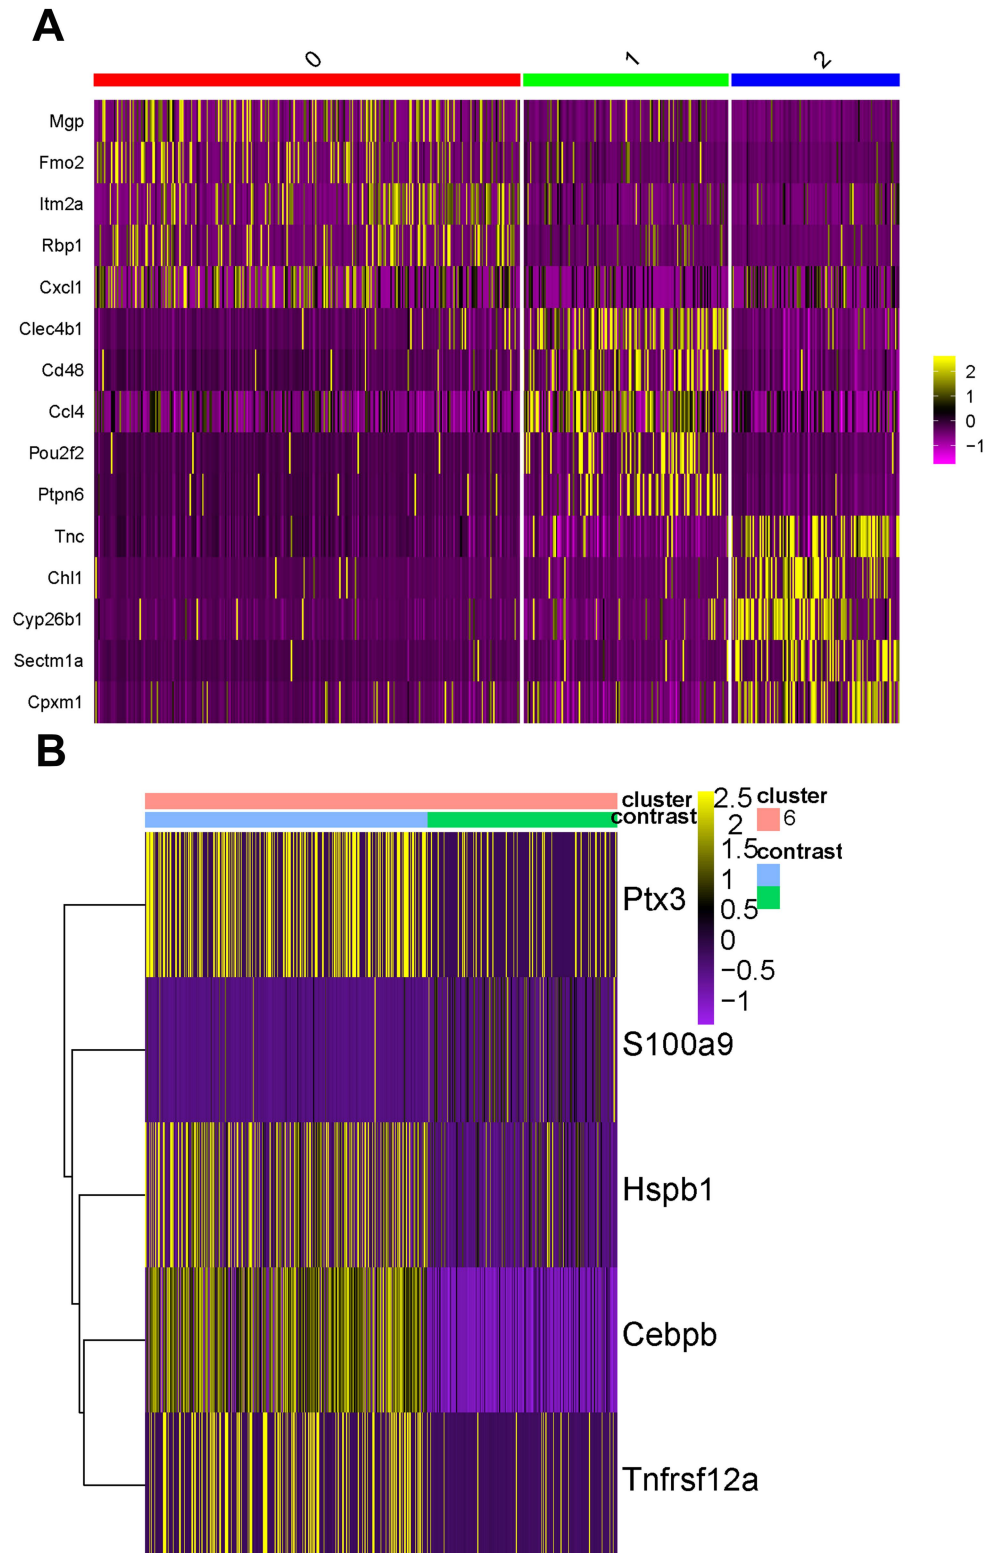

**Figure S9. Fibroblast cell clusters were described.**

**(A)** Heatmap showing specific marker genes in each fibroblast cluster. **(B)** Heatmap

of the genes that were at least two-fold upregulated in the fibroblasts from *Vsir*<sup>-/-</sup> psoriatic mice compared to that in the fibroblasts isolated from WT psoriatic mouse skin

Figure S10.

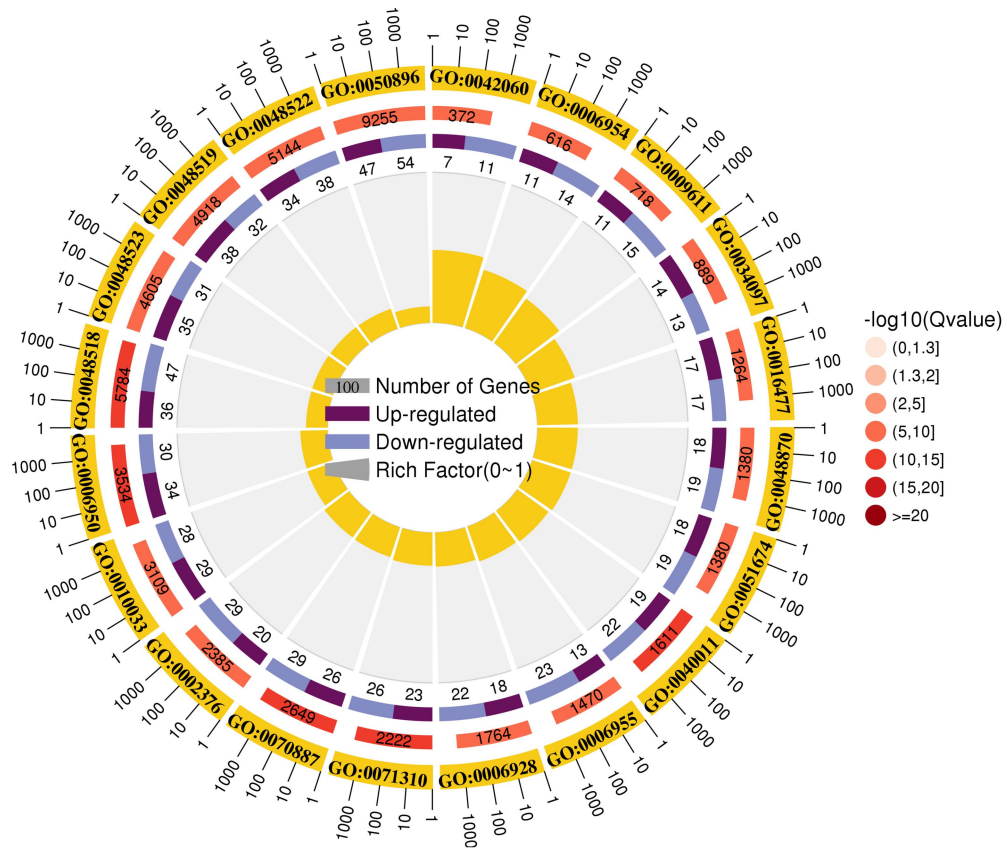

| GO ID      | Description                               |
|------------|-------------------------------------------|
| GO:0070887 | cellular response to chemical stimulus    |
| GO:0006950 | response to stress                        |
| GO:0048518 | positive regulation of biological process |
| GO:0071310 | cellular response to organic substance    |
| GO:0040011 | locomotion                                |
| GO:0010033 | response to organic substance             |
| GO:0048870 | cell motility                             |
| GO:0051674 | localization of cell                      |
| GO:0002376 | immune system process                     |
| GO:0006954 | inflammatory response                     |
| GO:0009611 | response to wounding                      |
| GO:0016477 | cell migration                            |
| GO:0006928 | movement of cell or subcellular component |
| GO:0006955 | immune response                           |
| GO:0048522 | positive regulation of cellular process   |
| GO:0048519 | negative regulation of biological process |
| GO:0034097 | response to cytokine                      |
| GO:0042060 | wound healing                             |
| GO:0048523 | negative regulation of cellular process   |
| GO:0050896 | response to stimulus                      |

Figure S10. GO term analysis of upregulated pathways in *Vsir<sup>-/-</sup>* versus WT fibroblasts was performed.

**Figure S11.**

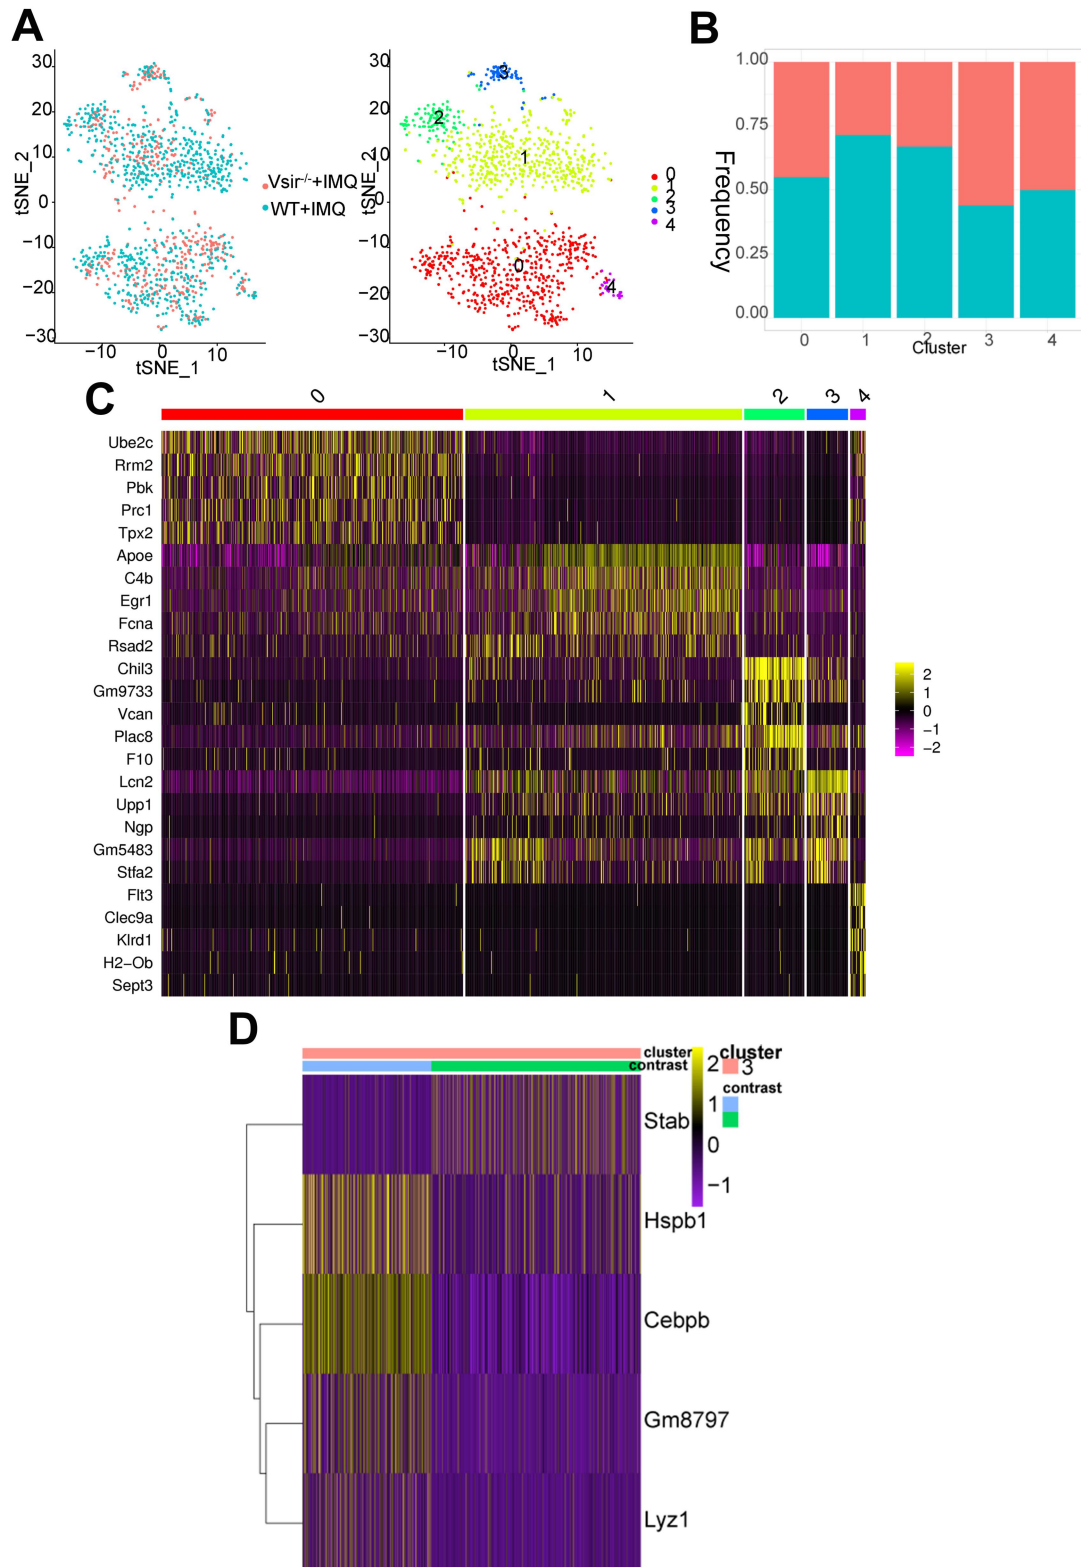

**Figure S11. Neutrophil cell clusters were identified.**

**(A)** The sample origin (left panel) and the tSNE plots of 1,261 neutrophils (right panel). **(B)** Bar plots exhibiting the cellular sources for neutrophils subtypes. Blocks represent different subjects and are color-coded by their derived groups defined in figure A. **(C)** Heatmap showing specific marker genes in each neutrophil cluster. **(D)** Heatmap of differentially expressed genes that were at least two-fold upregulated in neutrophil cell clusters from *Vsir<sup>-/-</sup>* psoriatic mice compared to neutrophil cell clusters isolated from WT psoriatic mice skin. tSNE, t-distributed stochastic neighbour embedding



Figure S12.

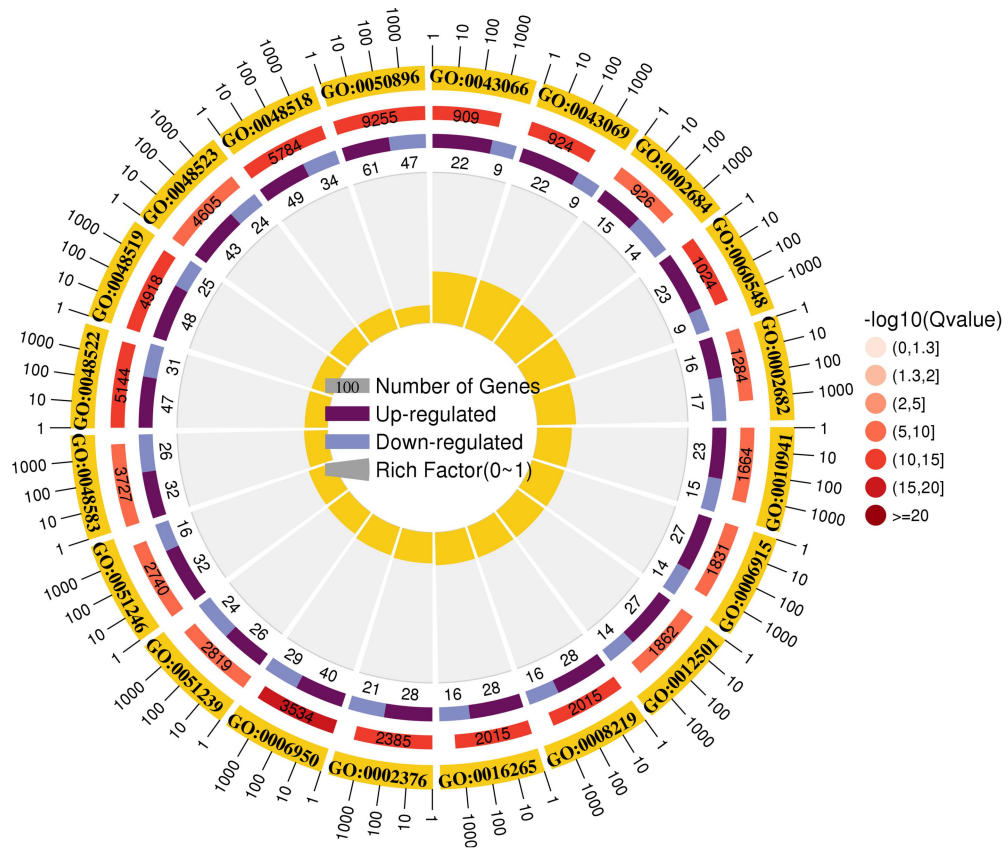

| GO ID      | Description                                    |
|------------|------------------------------------------------|
| GO:0006950 | response to stress                             |
| GO:0050896 | response to stimulus                           |
| GO:0048522 | positive regulation of cellular process        |
| GO:0048518 | positive regulation of biological process      |
| GO:0048519 | negative regulation of biological process      |
| GO:0043066 | negative regulation of apoptotic process       |
| GO:0043069 | negative regulation of programmed cell death   |
| GO:0002376 | immune system process                          |
| GO:0060548 | negative regulation of cell death              |
| GO:0008219 | cell death                                     |
| GO:0016265 | death                                          |
| GO:0006915 | apoptotic process                              |
| GO:0012501 | programmed cell death                          |
| GO:0002684 | positive regulation of immune system process   |
| GO:0048523 | negative regulation of cellular process        |
| GO:0010941 | regulation of cell death                       |
| GO:0051239 | regulation of multicellular organismal process |
| GO:0002682 | regulation of immune system process            |
| GO:0048583 | regulation of response to stimulus             |
| GO:0051246 | regulation of protein metabolic process        |

Figure S12. GO term analysis of upregulated pathways of in *Vsir<sup>-/-</sup>* versus WT neutrophils was performed.

Figure S13.

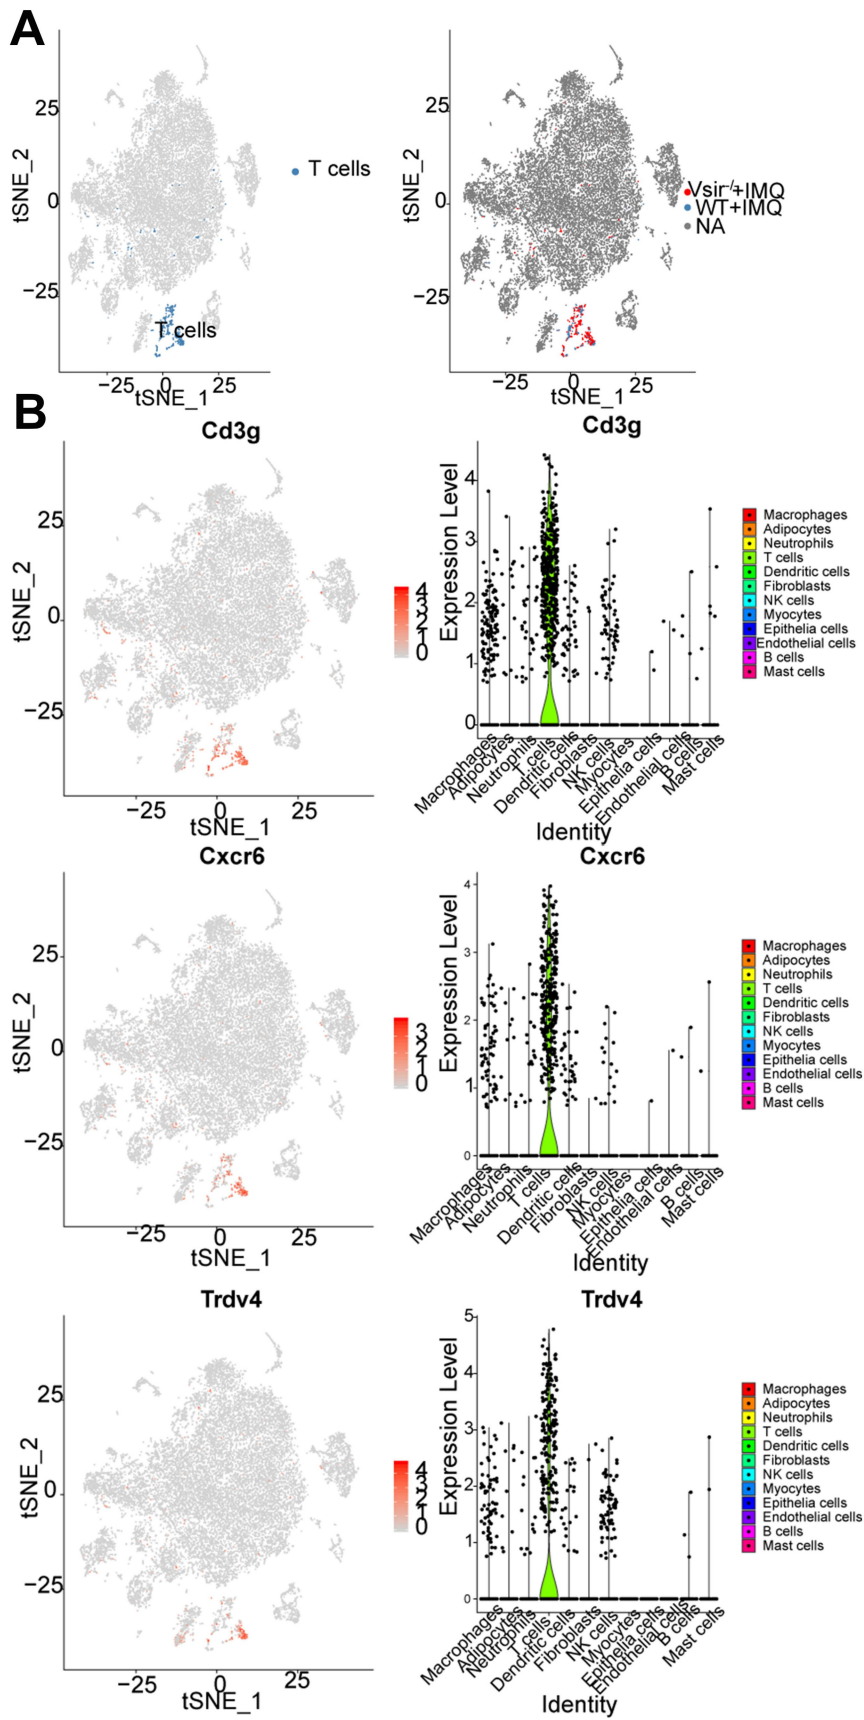

**Figure S13. T cells were identified.**

(A) The tSNE plots of 625 T cells (left panel) and the sample type of origin (right panel). (B) tSNE or expression (color bar, TP10K) of key T cell marker genes. tSNE, t-distributed stochastic neighbour embedding.

Figure S14.

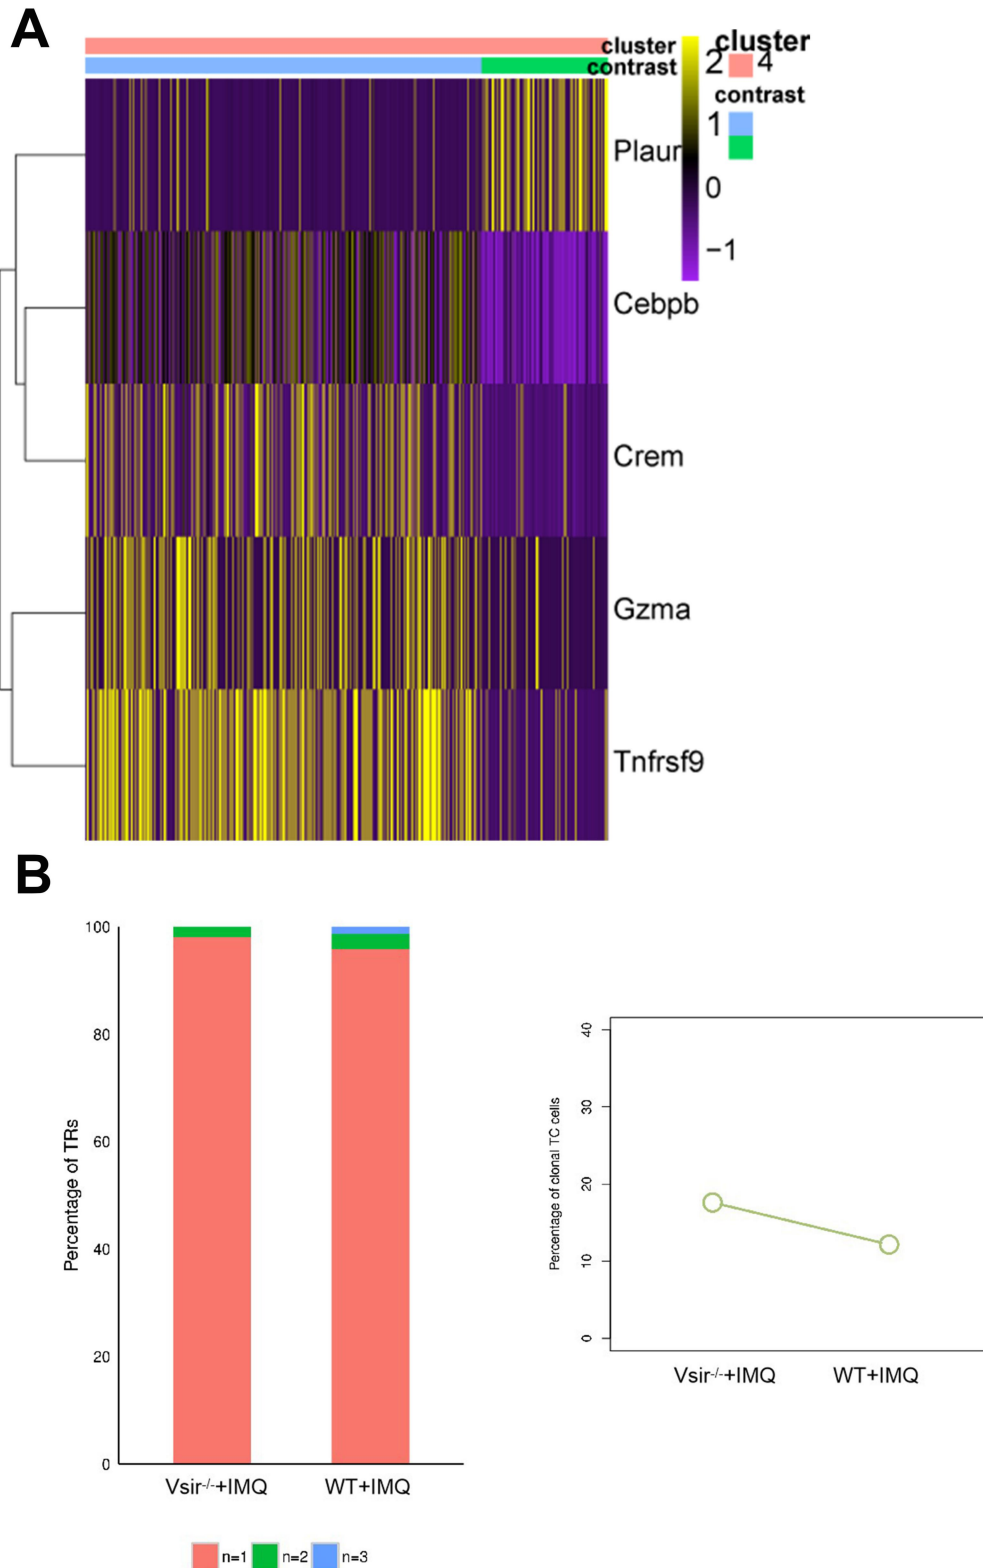

**Figure S14. The signature of T cells in *Vsir*<sup>-/-</sup> psoriatic mice has been described.**

(A) Heatmap of genes that were at least two-fold upregulated in T cells from *Vsir*<sup>-/-</sup>

psoriatic mice compared to T cells isolated from WT psoriatic mice skin. **(B)** The TCR distribution of T cells across different groups. Unique ( $n = 1$ ), duplicated ( $n = 2$ ), and clonal ( $n \geq 3$ ) TCRs are labeled with different colors (left panel). The proportions of clonal T cells in two different groups (right panel).

Figure S15.

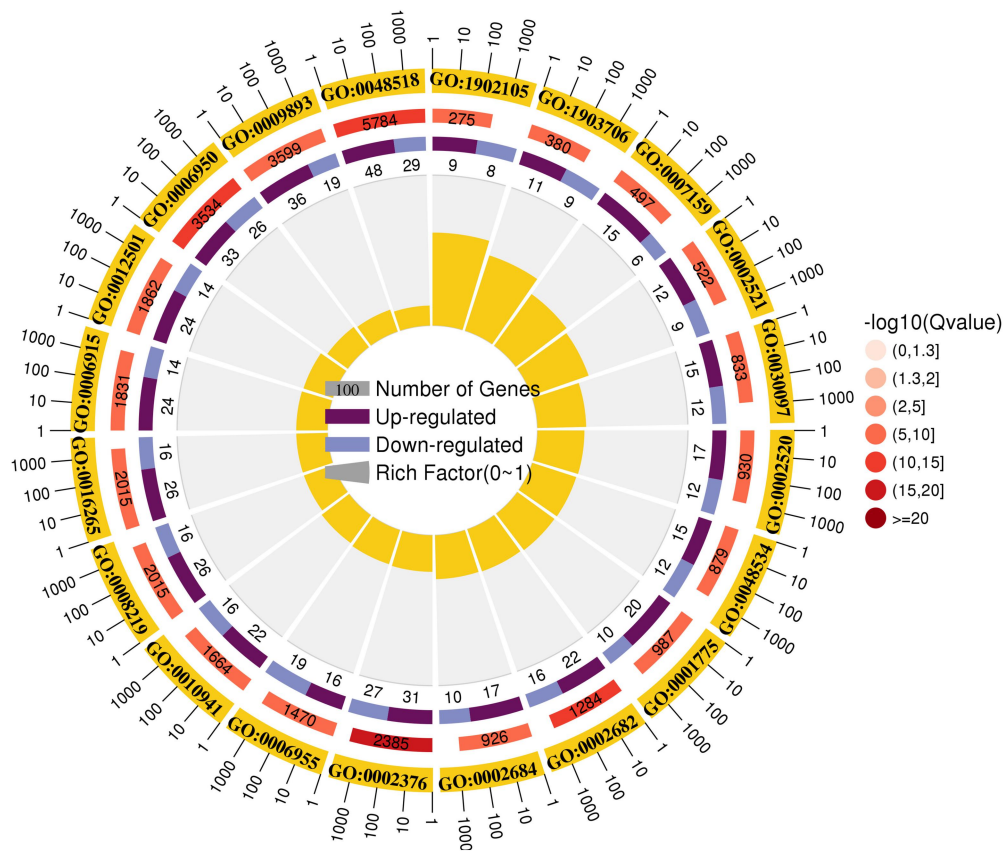

| GO ID      | Description                                  |
|------------|----------------------------------------------|
| GO:0002376 | immune system process                        |
| GO:0002682 | regulation of immune system process          |
| GO:0006950 | response to stress                           |
| GO:0048518 | positive regulation of biological process    |
| GO:1903706 | regulation of hemopoiesis                    |
| GO:0001775 | cell activation                              |
| GO:0002520 | immune system development                    |
| GO:0008219 | cell death                                   |
| GO:0016265 | death                                        |
| GO:0010941 | regulation of cell death                     |
| GO:0030097 | hemopoiesis                                  |
| GO:1902105 | regulation of leukocyte differentiation      |
| GO:0006955 | immune response                              |
| GO:0007159 | leukocyte cell-cell adhesion                 |
| GO:0048534 | hematopoietic or lymphoid organ development  |
| GO:0002521 | leukocyte differentiation                    |
| GO:0002684 | positive regulation of immune system process |
| GO:0006915 | apoptotic process                            |
| GO:0009893 | positive regulation of metabolic process     |
| GO:0012501 | programmed cell death                        |

Figure S15. GO term analysis of upregulated pathways of in *Vsir*<sup>-/-</sup> versus WT T cells were performed.

**Figure S16.**

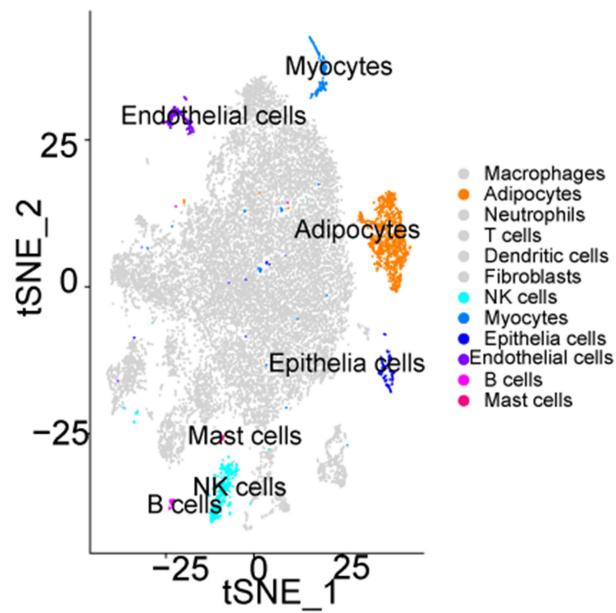

**Figure S16. Other clusters in murine psoriasis were defined.** The tSNE plot of NK cells, B cells, mast cells, endothelial cells, epithelia cells, myocytes and adipocytes was shown. NK cells, natural killer cells. tSNE, t-distributed stochastic neighbour embedding

**Figure S17.**

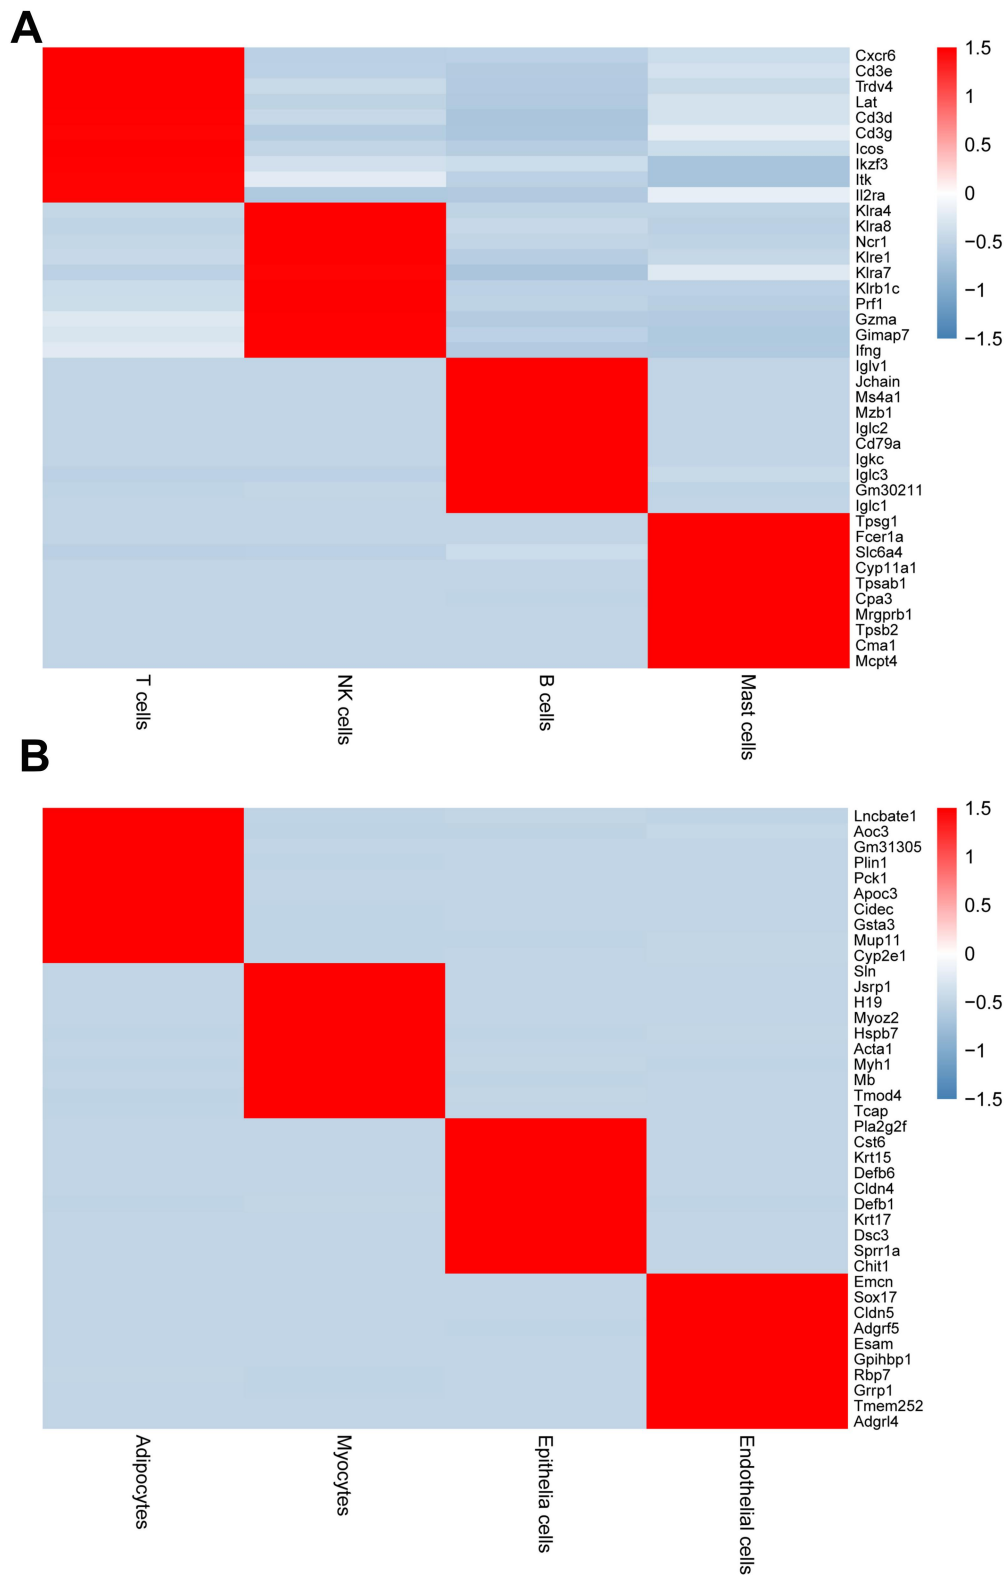

**Figure S17. (A)** Heatmap showing the 10 most upregulated genes (ordered by



decreasing p-value) in T cells, NK cells, B cells and mast cells defined in Figure S16, and selected enriched genes used for biological identification of clusters. **(B)** Heatmap showing the 10 most upregulated genes (ordered by decreasing p-value) in adipocytes, myocytes, epithelia cells and endothelial cells, and selected enriched genes used for biological identification of clusters. NK cells, natural killer cells.

**Figure S18.**

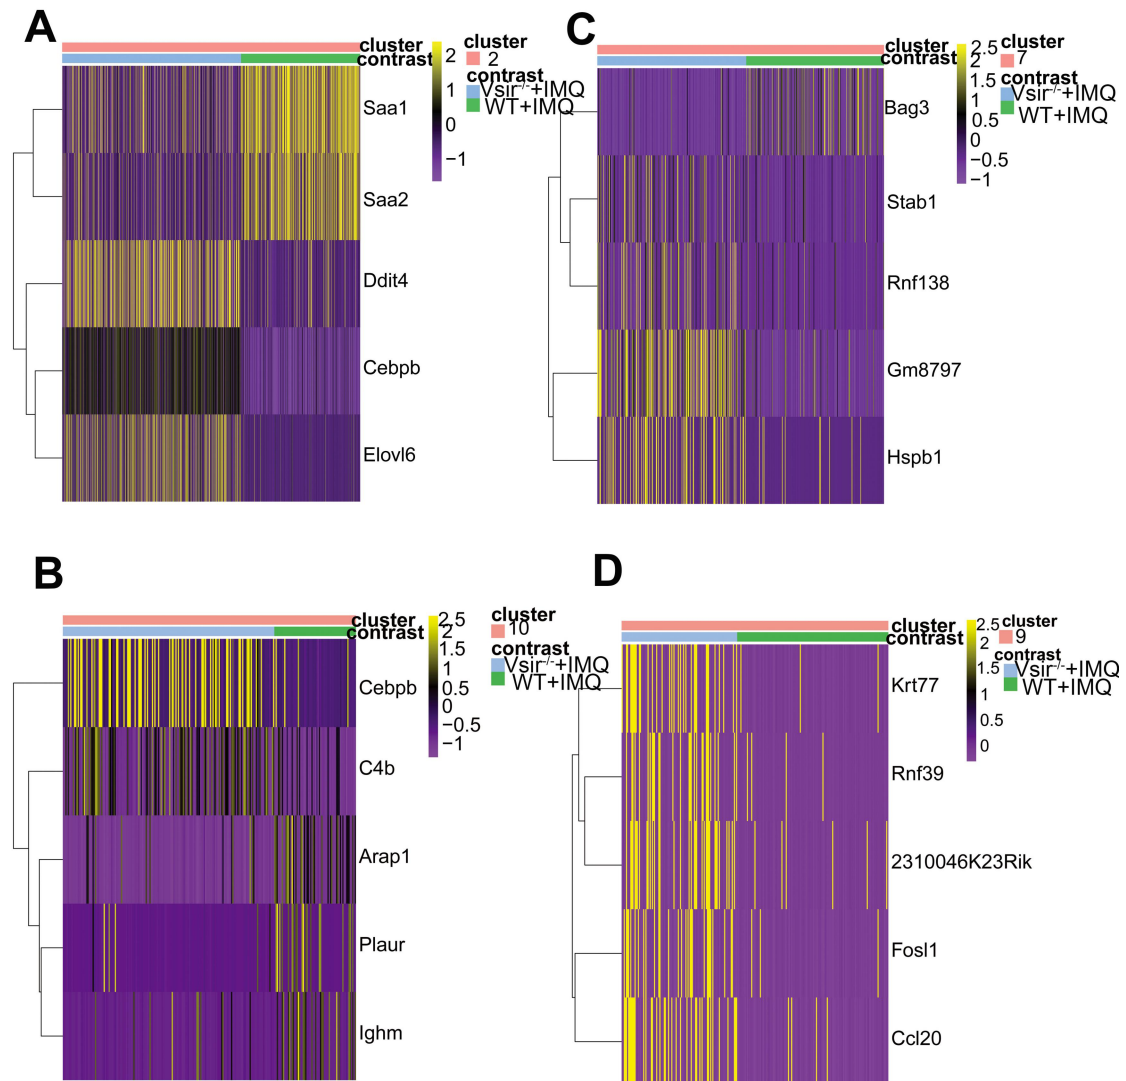

**Figure S18. Heatmap showed differentially expressed genes in other cell types.**

(A-D) Heatmap of genes that were at least two-fold upregulated in adipocytes (A), endothelial cells (B), NK cells (C), epithelia cells (D) from *Vsir*<sup>-/-</sup> psoriatic mice compared to WT psoriatic mice skin. NK cells, natural killer cells.

Figure S19.

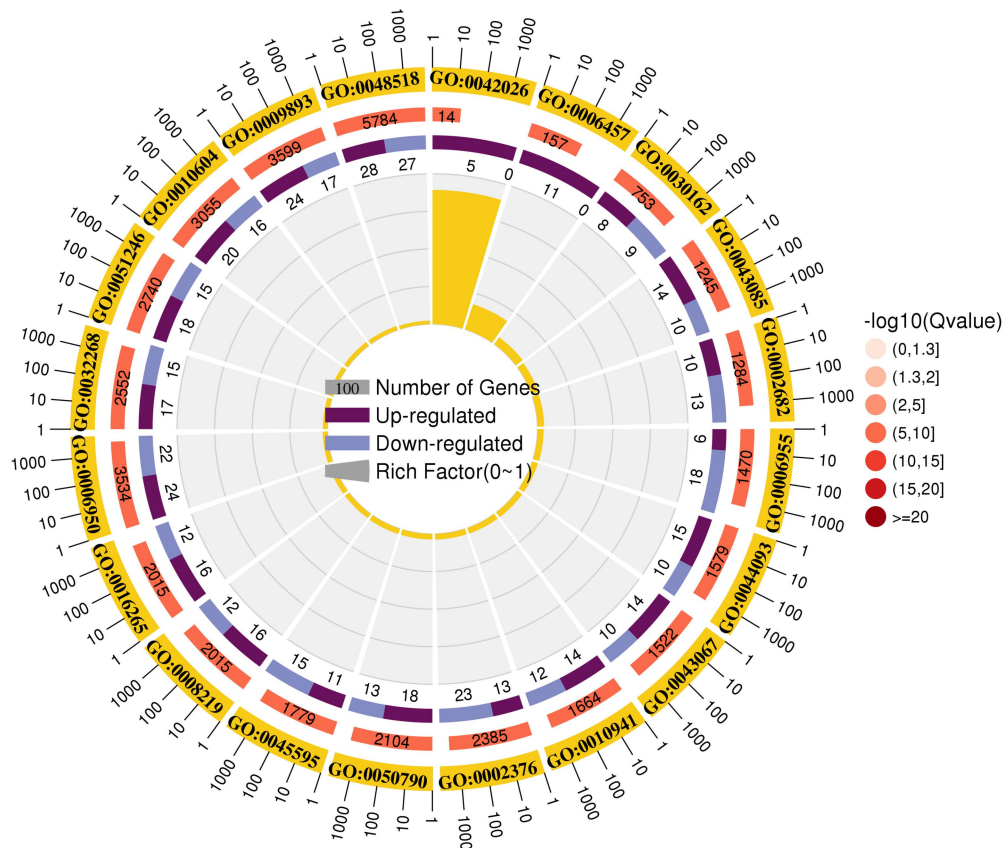

| GO ID      | Description                                            |
|------------|--------------------------------------------------------|
| GO:0006950 | response to stress                                     |
| GO:0002376 | immune system process                                  |
| GO:0006457 | protein folding                                        |
| GO:0048518 | positive regulation of biological process              |
| GO:0043085 | positive regulation of catalytic activity              |
| GO:0050790 | regulation of catalytic activity                       |
| GO:0009893 | positive regulation of metabolic process               |
| GO:0042026 | protein refolding                                      |
| GO:0002682 | regulation of immune system process                    |
| GO:0010941 | regulation of cell death                               |
| GO:0010604 | positive regulation of macromolecule metabolic process |
| GO:0044093 | positive regulation of molecular function              |
| GO:0006955 | immune response                                        |
| GO:0032268 | regulation of cellular protein metabolic process       |
| GO:0008219 | cell death                                             |
| GO:0016265 | death                                                  |
| GO:0030162 | regulation of proteolysis                              |
| GO:0051246 | regulation of protein metabolic process                |
| GO:0043067 | regulation of programmed cell death                    |
| GO:0045595 | regulation of cell differentiation                     |

Figure S19. GO term analysis of upregulated pathways of in *Vsir<sup>-/-</sup>* versus WT

NK cells.

**Table S1**

Table S1 Overview of sequencing data quality metrics for cells extracted from WT and *Vsir*<sup>-/-</sup> psoriatic mice.

|                                                | WT+IMQ      | <i>Vsir</i> <sup>-/-</sup> +IMQ |
|------------------------------------------------|-------------|---------------------------------|
| Estimated number of cells                      | 12,040      | 11,218                          |
| Number of Reads                                | 318,400,966 | 285,931,105                     |
| Valid Barcodes                                 | 93.7%       | 93.2%                           |
| Reads Mapped Confidently to Transcriptome      | 71.8%       | 69.4%                           |
| Reads Mapped Confidently to Exonic Regions     | 76.5%       | 73.1%                           |
| Reads Mapped Confidently to Intronic Regions   | 7.2%        | 6.0%                            |
| Reads Mapped Confidently to Intergenic Regions | 5.0%        | 6.4%                            |
| Reads Mapped Antisense to Gene                 | 3.9%        | 2.7%                            |
| Sequencing Saturation                          | 73.4%       | 77.5%                           |
| Q30 Bases in Barcode                           | 96.1%       | 95.0%                           |
| Q30 Bases in RNA Read                          | 91.1%       | 92.4%                           |
| Q30 Bases in UMI                               | 95.5%       | 93.5%                           |
